# Supplementary material for: Unexpected water uptake under drought conditions and thinning treatments in young and overstocked lodgepole pine (Pinus contorta) forests
Source: Copernicus journal article supplement (doi:10.5194/egusphere-2024-88), 2024-01-25
Supplement: Supplementary file 1 [file egusphere-2024-88-supplement.pdf]

## Supplementary Tables and Figures

**Table S1.** Mean (standard deviation), minimum, maximum, and median monthly meteorological variables recorded in block 1 treatment 2 including temperature (°C), relative humidity (%), solar radiation(W/m<sup>2</sup>), windspeed (km/h), vapor pressure deficit (VPD - pa), precipitation (mm), daily PET using the Hargraves and Priestly-Taylor methods (mm/day), monthly PET using the Thornthwaite method (mm/month), dryness index (PET/P), standard precipitation index (SPI) using a 3 month period and a 6 month period, and standardized precipitation evaporation index (SPEI) with 3 and 6 month intervals (missing indicates interval periods would enough data).

|                          | <b>06</b>            | <b>07</b>            | <b>08</b>              | <b>09</b>            | <b>10</b>            | <b>Overall</b>          |
|--------------------------|----------------------|----------------------|------------------------|----------------------|----------------------|-------------------------|
| <b>Temperature</b>       |                      |                      |                        |                      |                      |                         |
| <b>Mean (SD)</b>         | 12.6 (9.08)          | 16.9 (6.58)          | 13.0 (6.74)            | 8.21 (5.65)          | 4.00 (4.68)          | 12.2 (7.86)             |
| <b>Median [Min, Max]</b> | 11.1 [-2.68, 37.8]   | 16.7 [0.0789, 34.8]  | 12.8 [-0.676, 30.8]    | 7.29 [-2.92, 27.0]   | 4.17 [-4.26, 16.9]   | 11.3 [-4.26, 37.8]      |
| <b>Relative Humidity</b> |                      |                      |                        |                      |                      |                         |
| <b>Mean (SD)</b>         | 63.3 (21.5)          | 50.1 (17.9)          | 64.2 (22.8)            | 71.2 (19.7)          | 72.9 (13.5)          | 62.7 (21.7)             |
| <b>Median [Min, Max]</b> | 65.4 [17.0, 97.6]    | 48.5 [16.0, 97.6]    | 63.7 [13.7, 97.9]      | 75.4 [23.9, 98.3]    | 76.8 [40.2, 93.5]    | 62.3 [13.7, 98.3]       |
| <b>Solar Radiation</b>   |                      |                      |                        |                      |                      |                         |
| <b>Mean (SD)</b>         | 236 (339)            | 240 (331)            | 145 (235)              | 109 (197)            | 91.7 (177)           | 176 (282)               |
| <b>Median [Min, Max]</b> | 54.4 [0.600, 1280]   | 54.4 [0.600, 1240]   | 25.6 [0.600, 1160]     | 4.40 [0.600, 1120]   | 0.600 [0.600, 884]   | 29.4 [0.600, 1280]      |
| <b>Windspeed</b>         |                      |                      |                        |                      |                      |                         |
| <b>Mean (SD)</b>         | 0 (0)                | 0 (0)                | 0.00020117 (0.0134863) | 0 (0)                | 0 (0)                | 0.00004925 (0.00666268) |
| <b>Median [Min, Max]</b> | 0 [0, 0]             | 0 [0, 0]             | 0 [0, 0.560]           | 0 [0, 0]             | 0 [0, 0]             | 0 [0, 0.560]            |
| <b>VPD</b>               |                      |                      |                        |                      |                      |                         |
| <b>Mean (SD)</b>         | 0.829 (0.989)        | 1.16 (0.807)         | 0.727 (0.719)          | 0.416 (0.449)        | 0.263 (0.216)        | 0.755 (0.794)           |
| <b>Median [Min, Max]</b> | 0.423 [0.0221, 5.13] | 0.947 [0.0269, 4.63] | 0.520 [0.0192, 3.52]   | 0.242 [0.0128, 2.70] | 0.185 [0.0372, 1.05] | 0.489 [0.0128, 5.13]    |

|                          |                      |                      |                      |                   |                      |                      |
|--------------------------|----------------------|----------------------|----------------------|-------------------|----------------------|----------------------|
| <b>Precipitation</b>     |                      |                      |                      |                   |                      |                      |
| <b>Mean (SD)</b>         | 0.00896 (0.0927)     | 0.00843 (0.275)      | 0.00703 (0.0559)     | 0.00916 (0.0680)  | 0.00337 (0.0523)     | 0.00808 (0.150)      |
| <b>Median [Min, Max]</b> | 0 [0, 3.40]          | 0 [0, 16.0]          | 0 [0, 1.19]          | 0 [0, 1.80]       | 0 [0, 1.19]          | 0 [0, 16.0]          |
| <b>Daily PET</b>         |                      |                      |                      |                   |                      |                      |
| <b>Hargreaves</b>        |                      |                      |                      |                   |                      |                      |
| <b>Mean (SD)</b>         | 79.8 (46.4)          | 111 (56.6)           | 77.5 (40.9)          | 70.2 (43.5)       | 61.3 (26.8)          | 83.3 (48.4)          |
| <b>Median [Min, Max]</b> | 64.8 [20.2, 172]     | 99.8 [31.4, 191]     | 68.3 [22.7, 146]     | 64.7 [13.5, 154]  | 64.9 [22.3, 94.2]    | 77.5 [13.5, 191]     |
| <b>Priestly Taylor</b>   |                      |                      |                      |                   |                      |                      |
| <b>Mean (SD)</b>         | 130 (28.1)           | 141 (8.65)           | 91.4 (22.1)          | 53.6 (16.1)       | 30.0 (4.76)          | 99.2 (42.5)          |
| <b>Median [Min, Max]</b> | 132 [81.6, 175]      | 142 [121, 153]       | 93.4 [39.7, 140]     | 52.8 [29.5, 87.1] | 30.3 [23.5, 37.8]    | 100 [23.5, 175]      |
| <b>Monthly PET</b>       |                      |                      |                      |                   |                      |                      |
| <b>Thornthwaite PET</b>  |                      |                      |                      |                   |                      |                      |
| <b>Mean (SD)</b>         | 138 (NA)             | 164 (NA)             | 106 (NA)             | 70.5 (NA)         | 37.6 (NA)            | 103 (50.7)           |
| <b>Median [Min, Max]</b> | 138 [138, 138]       | 164 [164, 164]       | 106 [106, 106]       | 70.5 [70.5, 70.5] | 37.6 [37.6, 37.6]    | 106 [37.6, 164]      |
| <b>PET/P</b>             |                      |                      |                      |                   |                      |                      |
| <b>Mean (SD)</b>         | 1.58 (NA)            | 1.94 (NA)            | 2.46 (NA)            | 1.53 (NA)         | 10.0 (NA)            | 3.51 (3.67)          |
| <b>Median [Min, Max]</b> | 1.58 [1.58, 1.58]    | 1.94 [1.94, 1.94]    | 2.46 [2.46, 2.46]    | 1.53 [1.53, 1.53] | 10.0 [10.0, 10.0]    | 1.94 [1.53, 10.0]    |
| <b>spi3</b>              |                      |                      |                      |                   |                      |                      |
| <b>Mean (SD)</b>         | -1.26 (NA)           | -1.20 (NA)           | -1.38 (NA)           | NA (NA)           | -1.44 (NA)           | -1.32 (0.109)        |
| <b>Median [Min, Max]</b> | -1.26 [-1.26, -1.26] | -1.20 [-1.20, -1.20] | -1.38 [-1.38, -1.38] | NA [NA, NA]       | -1.44 [-1.44, -1.44] | -1.32 [-1.44, -1.20] |
| <b>Missing</b>           | 0 (0%)               | 0 (0%)               | 0 (0%)               | 1 (100%)          | 0 (0%)               | 1 (20.0%)            |
| <b>spi6</b>              |                      |                      |                      |                   |                      |                      |
| <b>Mean (SD)</b>         | -1.13 (NA)           | NA (NA)              | NA (NA)              | NA (NA)           | -1.59 (NA)           | -1.36 (0.325)        |

|                          |                         |                      |                      |                      |                      |                       |
|--------------------------|-------------------------|----------------------|----------------------|----------------------|----------------------|-----------------------|
| <b>Median [Min, Max]</b> | -1.13 [-1.13, -1.13]    | NA [NA, NA]          | NA [NA, NA]          | NA [NA, NA]          | -1.59 [-1.59, -1.59] | -1.36 [-1.59, -1.13]  |
| <b>Missing</b>           | 0 (0%)                  | 1 (100%)             | 1 (100%)             | 1 (100%)             | 0 (0%)               | 3 (60.0%)             |
| <b>spei3</b>             |                         |                      |                      |                      |                      |                       |
| <b>Mean (SD)</b>         | -1.23 (NA)              | -1.40 (NA)           | -1.77 (NA)           | -1.50 (NA)           | -1.43 (NA)           | -1.47 (0.198)         |
| <b>Median [Min, Max]</b> | -1.23 [-1.23, -1.23]    | -1.40 [-1.40, -1.40] | -1.77 [-1.77, -1.77] | -1.50 [-1.50, -1.50] | -1.43 [-1.43, -1.43] | -1.43 [-1.77, -1.23]  |
| <b>spei6</b>             |                         |                      |                      |                      |                      |                       |
| <b>Mean (SD)</b>         | -0.855 (NA)             | -1.33 (NA)           | -1.73 (NA)           | -1.68 (NA)           | -1.67 (NA)           | -1.45 (0.371)         |
| <b>Median [Min, Max]</b> | -0.855 [-0.855, -0.855] | -1.33 [-1.33, -1.33] | -1.73 [-1.73, -1.73] | -1.68 [-1.68, -1.68] | -1.67 [-1.67, -1.67] | -1.67 [-1.73, -0.855] |

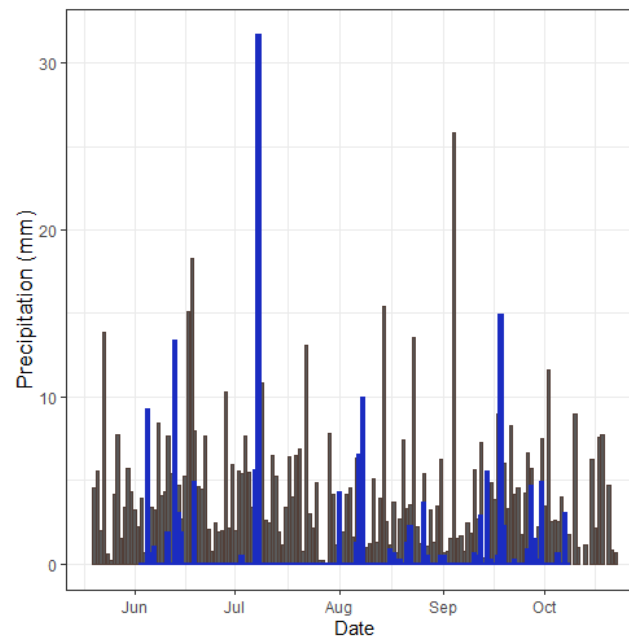

**Figure S1.** Mean daily historical (1997?-2008: grey) and 2021 (blue) rainfall (mm) from June to October.

**Table S2.** Proportion of source water uptake by xylem water for six scenarios using different combinations of isotopes (single and dual) and sources including soil water (5 cm, 35cm, 45-100cm, and the average of 35-100 cm) and groundwater.

| Scenario | Isotopes Used | Sources | Runtime | Percent contributed |       |              |       |           |    |    |    | Total | Gelman-Rubin |
|----------|---------------|---------|---------|---------------------|-------|--------------|-------|-----------|----|----|----|-------|--------------|
|          |               |         |         | 5 cm                | SD    | 35 cm        | SD    | 45-100 cm | SD | GW | SD |       |              |
| 1        | d18O          | 5, 35   | normal  |                     |       |              |       |           |    |    |    | 0     | 4            |
|          | 6             |         |         | <b>0.76</b>         | 0.325 | 0.167        | 0.100 |           |    |    |    | 0.927 |              |
|          | 7             |         |         | <b>0.343</b>        | 0.179 | 0.259        | 0.133 |           |    |    |    | 0.602 |              |
|          | 9             |         |         | <b>0.131</b>        | 0.274 | 0.121        | 0.119 |           |    |    |    | 0.252 |              |
|          | 10            |         |         | 0.001               | 0.003 | <b>0.725</b> | 0.141 |           |    |    |    | 0.726 |              |
|          |               |         |         |                     |       | <b>333</b>   | 667   |           |    |    |    | 333   |              |
| 2        | d2H           | 5, 35   | normal  |                     |       |              |       |           |    |    |    | 0     | 3            |
|          | 6             |         |         | <b>0.852</b>        | 0.087 | 0.147        | 0.087 |           |    |    |    | 1     |              |
|          | 7             |         |         | <b>0.672</b>        | 0.087 | 0.328        | 0.087 |           |    |    |    | 1     |              |
|          | 9             |         |         | <b>0.806</b>        | 0.094 | 0.193        | 0.094 |           |    |    |    | 1     |              |
|          | 10            |         |         | 0.066               | 0.041 | <b>0.933</b> | 0.041 |           |    |    |    | 1     |              |
|          |               |         |         |                     |       | <b>667</b>   | 667   |           |    |    |    |       |              |
| 3        | d18O + d2H    | 5, 35   | normal  |                     |       |              |       |           |    |    |    | 0     |              |
|          | 6             |         |         | <b>0.76</b>         | 0.325 | 0.108        | 0.045 |           |    |    |    | 0.868 | 15           |
|          | 7             |         |         | <b>0.343</b>        | 0.179 | 0.137        | 0.066 |           |    |    |    | 0.48  |              |
|          |               |         |         |                     |       |              | 333   |           |    |    |    |       |              |

|   |               |                       |            |                            |              |                            |              |                            |              |              |              |              |     |
|---|---------------|-----------------------|------------|----------------------------|--------------|----------------------------|--------------|----------------------------|--------------|--------------|--------------|--------------|-----|
|   | 9             |                       |            | 0.131                      | 0.274        | <b>0.347</b><br><b>333</b> | 0.032<br>333 |                            |              |              |              | 0.478<br>333 |     |
|   | 10            |                       |            | 0.001                      | 0.003        | <b>0.994</b>               | 0.017<br>5   |                            |              |              |              | 0.995        |     |
| 4 | d18O +<br>d2H | 5, 35, 45-<br>100     | norm<br>al |                            |              |                            |              |                            |              |              |              | 0            |     |
|   | 6             |                       |            | <b>0.76</b>                | 0.325        | 0.214<br>333               | 0.233<br>333 | 0.027                      | 0.044        |              |              | 1.001<br>333 | 120 |
|   | 7             |                       |            | 0.343                      | 0.179        | 0.134<br>333               | 0.168<br>333 | <b>0.379</b>               | 0.08         |              |              | 0.856<br>333 |     |
|   | 9             |                       |            | 0.131                      | 0.274        | <b>0.366</b>               | 0.343<br>333 | 0.174                      | 0.109        |              |              | 0.671        |     |
|   | 10            |                       |            | 0.001                      | 0.003        | 0.001<br>667               | 0.005        | <b>0.9963</b><br><b>33</b> | 0.008<br>667 |              |              | 0.999        |     |
| 5 | d18O +<br>d2H | 5, 35-100,<br>GW      | norm<br>al |                            |              |                            |              |                            |              |              |              | 0            | 153 |
|   | 6             |                       |            | 0.312<br>333               | 0.245<br>333 | <b>0.669</b><br><b>333</b> | 0.404<br>333 |                            |              | 0.074        | 0.204<br>667 | 1.055<br>667 |     |
|   | 7             |                       |            | 0.253<br>333               | 0.311        | <b>0.455</b>               | 0.401        |                            |              | 0.035<br>667 | 0.128        | 0.744        |     |
|   | 9             |                       |            | 0.200<br>667               | 0.137<br>667 | <b>0.335</b>               | 0.409<br>333 |                            |              | 0.06         | 0.126        | 0.595<br>667 |     |
|   | 10            |                       |            | <b>0.753</b><br><b>5</b>   | 0.306        | 0.166<br>333               | 0.278<br>333 |                            |              | 0.086<br>667 | 0.147<br>667 | 1.006<br>5   |     |
| 6 | d18O +<br>d2H | 5, 35, 45-<br>100, GW | norm<br>al |                            |              |                            |              |                            |              |              |              | 0            | 15  |
|   | 6             |                       |            | <b>0.767</b><br><b>667</b> | 0.321<br>667 | 0.083<br>333               | 0.182<br>667 | 0.027                      | 0.01         | 0.136<br>333 | 0.261<br>667 | 1.014<br>333 |     |
|   | 7             |                       |            | <b>0.477</b><br><b>333</b> | 0.225<br>667 | 0.074                      | 0.135<br>667 | 0.18                       | 0.174        | 0.066<br>667 | 0.134<br>333 | 0.798        |     |
|   | 9             |                       |            | 0.134<br>667               | 0.290<br>333 | <b>0.427</b><br><b>667</b> | 0.346<br>333 | 0.1276<br>67               | 0.032<br>667 | 0.237<br>667 | 0.345<br>667 | 0.927<br>667 |     |

|  |    |  |  |              |              |              |       |              |              |       |              |              |  |
|--|----|--|--|--------------|--------------|--------------|-------|--------------|--------------|-------|--------------|--------------|--|
|  | 10 |  |  | 0.001<br>333 | 0.004<br>333 | 0.001<br>333 | 0.005 | <b>0.338</b> | 0.650<br>667 | 0.001 | 0.004<br>667 | 0.341<br>667 |  |
|--|----|--|--|--------------|--------------|--------------|-------|--------------|--------------|-------|--------------|--------------|--|
