# Supplementary material for: Unexpected water uptake under drought conditions and thinning treatments in young and overstocked lodgepole pine (Pinus contorta) forests
Source: Copernicus journal article supplement (doi:10.5194/egusphere-2024-88), 2024-01-25

## New Figures

### Continuous Soil Moisture:

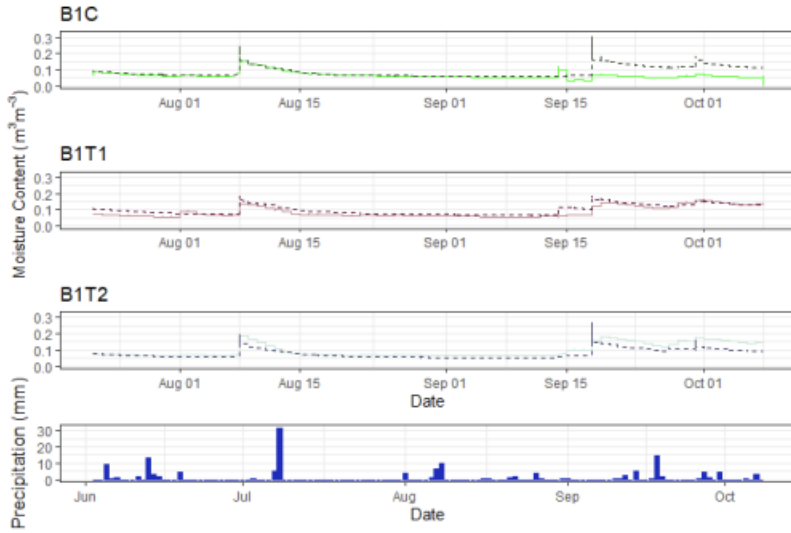

### Revised Soil Depth Profile

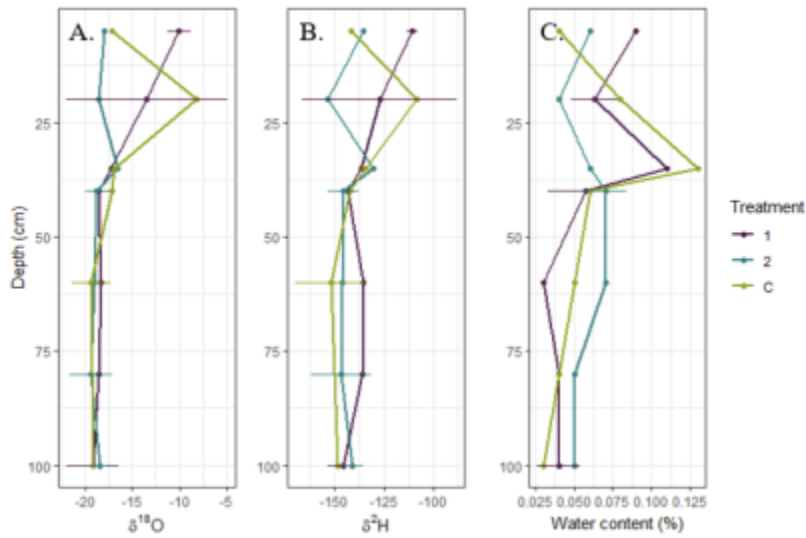

Supplement: Supplementary file [file egusphere-2024-88-AC1-supplement.pdf]
